## **Barriers and enablers to blood culture sampling: a systematic review and theoretical domains framework survey in Indonesia, Thailand and Vietnam**

Pornpan Suntornsut, MSc<sup>1</sup>, Koe Stella Asadinia, MD<sup>2</sup>, Ralalicia Limato, MD<sup>2,3</sup>, Alice Tamara, MD<sup>2</sup>, Linda W.A. Rotty, MD<sup>4</sup>, Rendra Bramanti, MD<sup>5</sup>, Dwi U. Nusantara, MD<sup>6</sup>, Erni J. Nelwan, MD<sup>7,8</sup> Suwimon Khusuwan, MD<sup>9</sup>, Watthanapong Suphamongkholaikul, MD<sup>10</sup>, Parinya Chamnan, MD<sup>10</sup>, Watcharapong Piyaphanee, MD<sup>11</sup>, Vu Thi Lan Huong, MD<sup>12</sup>, Nguyen Hai Yen, MPH<sup>12</sup>, Khanh Nguyen Hong, MSc<sup>12</sup>, Pham Ngoc Thach, MD<sup>13</sup>, Le Minh Quang, MD<sup>14</sup>, Vu Hai Vinh, PhD<sup>14</sup>, Chau Minh Duc, PhD<sup>15</sup>, Vo Thi Hoang Dung Em MD<sup>15</sup>, Elinor Harriss, MSc<sup>16</sup>, H Rogier van Doorn, MD<sup>3,12</sup>, Raph L. Hamers MD<sup>2,3</sup>, Fabiana Lorencatto, PhD<sup>17</sup>, Lou Atkins, PhD<sup>17</sup>, Direk Limmathurotsakul, MD<sup>1,3,18</sup>

<sup>1</sup> Mahidol-Oxford Tropical Medicine Research Unit, Faculty of Tropical Medicine, Mahidol University, Bangkok, Thailand

<sup>2</sup> Oxford University Clinical Research Unit Indonesia, Faculty of Medicine Universitas Indonesia, Jakarta, Indonesia

<sup>3</sup> Centre for Tropical Medicine and Global Health, Nuffield Department of Medicine, University of Oxford, Oxford, United Kingdom

<sup>4</sup> Prof. Dr. R.D. Kandou Central Hospital, Manado, Indonesia

<sup>5</sup> Dr. Iskak District Hospital, Tulungagung, Indonesia

<sup>6</sup> Pasar Minggu District Hospital, Jakarta, Indonesia

<sup>7</sup> Faculty of Medicine, Universitas Indonesia, Jakarta, Indonesia

<sup>8</sup> Department of Internal Medicine, Division of Infectious Diseases, Cipto Mangokusumo National General Hospital, Jakarta, Indonesia

<sup>9</sup> Chiangrai Prachanukroh Hospital, Chiang Rai, Thailand

<sup>10</sup> Sunpasitthiprasong Hospital, Ubon Ratchathani, Thailand

<sup>11</sup> Hospital for Tropical Diseases, Faculty of Tropical Medicine, Mahidol University, Bangkok, Thailand

<sup>12</sup> Oxford University Clinical Research Unit, Hanoi, Vietnam.

<sup>13</sup> National Hospital for Tropical Diseases, 78 Giai Phong, Ha Noi, Viet Nam

<sup>14</sup> Viet Tiep Hospital, 1 Nha Thuong, Cat Dai, Le Chan, Hai Phong, Viet Nam

<sup>15</sup> Dong Thap Hospital, 144 Mai Van Khai, My Tan, Cao Lanh City, Dong Thap, Viet Nam

<sup>16</sup> Bodleian Health Care Libraries, University of Oxford, Oxford, United Kingdom

<sup>17</sup> Centre for Behaviour Change, University College London, London, United Kingdom

<sup>18</sup> Department of Tropical Hygiene, Faculty of Tropical Medicine, Mahidol University, Bangkok, Thailand

\* Correspondence to:

Direk Limmathurotsakul

Mahidol-Oxford Tropical Medicine Research Unit, Faculty of Tropical Medicine, Mahidol University, Bangkok, Thailand, 10400. email: [direk@tropmedres.ac](mailto:direk@tropmedres.ac)

Word count: abstract 300, text 4,421

## 1 **Abstract**

### 2 **Background**

3 Blood culture (BC) sampling is recommended for all suspected sepsis patients prior to antibiotic  
4 administration. Here, we aimed to identify barriers and enablers to BC sampling in three  
5 Southeast Asian countries.

### 6 **Methods**

7 We conducted a systematic review of studies evaluating barriers/enablers to BC sampling from  
8 1900 to 2020 globally (PROSPERO, CRD42020206557). Using the findings of the systematic  
9 review, we developed and conducted a Theoretical Domains Framework (TDF)-based survey  
10 with a case scenario question among doctors and final-year medical students in Indonesia,  
11 Thailand and Vietnam.

### 12 **Findings**

13 In the systematic review, we identified 6,175 unique records from the databases, of which 25 met  
14 the eligibility criteria. Studies were conducted in 37 high-income countries (HICs) and 41 low-  
15 and middle-income countries (LMICs). Of 14 TDF domains, three and seven were not assessed  
16 in HICs and LMICs by the studies included in the systematic review, respectively. 1,070 medical  
17 doctors and 238 final-year medical students completed the survey. The proportion of respondents  
18 who would definitely take BC in the case scenario was 89.8% for Thai, 50.5% for Vietnamese  
19 and 31.3% for Indonesians ( $p < 0.001$ ). Eight TDF domains were considered key in influencing  
20 BC sampling, including ‘no awareness of guideline [TDF-knowledge]’, ‘low priority of BC  
21 [TDF-goals]’, ‘no intention to follow guidelines [TDF-intention]’, ‘level of doctors who can  
22 order or initiate an order for BC [TDF-social professional role and identity]’, ‘no norms of BC  
23 sampling [TDF-social influence]’, ‘perceived cost-effectiveness of BC [TDF-environmental

24 context and resources]’, ‘regulation on cost reimbursement [TDF-behavioural regulation]’ and  
25 ‘consequences that discourage BC sampling [TDF-reinforcement].’ However, there was  
26 substantial heterogeneity between the countries across most domains.

## 27 **Conclusions**

28 Evidence on barriers and enablers to BC sampling is limited globally. We identified individual,  
29 socio-cultural and environmental barriers/enablers to BC sampling across different countries,  
30 which represent potential targets for interventions. Context-specific multifaceted interventions at  
31 both hospital and policy levels are required to improve diagnostic stewardship practices.

32

## 33 **Funding**

34 Wellcome Trust, UK (220557/Z/20/Z).

35

## 36 **Introduction**

37 Blood culture (BC) is a crucial diagnostic, which can guide antibiotic treatment decisions of  
38 severe bacterial infections, and may improve patient outcomes.<sup>1,2</sup> The cumulative results of BC  
39 are also crucial to inform antimicrobial resistance (AMR) surveillance, at the hospital, country  
40 and global levels.<sup>3</sup> International guidelines on sepsis management have been stressing the  
41 importance of obtaining BC before or, when not possible, within 24 hours after administration of  
42 antibiotics.<sup>1,4</sup>

43  
44 Nonetheless, BC sampling rates are generally underutilized, both in high-income countries  
45 (HICs) and low and middle-income countries (LMICs), with wide variations in reported rates  
46 between hospitals and global regions. Reported hospital BC sampling rates ranged from 196 to  
47 308 per 1,000 patient-days in the United States,<sup>5,6</sup> from 6.7 to 86.5 per 1,000 patient-days in the  
48 European Union,<sup>7</sup> from 0 to 82 per 1,000 patient-days in the Central Asian and European  
49 Surveillance of AMR network (CAESAR),<sup>8</sup> and 31, 82 and 10 per 1,000 patient-days in selected  
50 hospitals in Indonesia,<sup>9</sup> Thailand<sup>10</sup> and Vietnam<sup>11</sup>, respectively.

51  
52 A range of barriers and enablers have been identified that influence BC sampling, based on  
53 different study designs, theories and frameworks. Lack of clear guidelines, training,  
54 microbiological infrastructure, and positive attitudes regarding BC among medical practitioners,  
55 are commonly reported barriers.<sup>8,12-15</sup> However, to date the evidence has not been systematically  
56 assessed or integrated.

57

58 Changing the behavior of medical practitioners is complex, and systematic approach have been  
59 shown useful to understand factors influencing adherence to guidelines or recommendations so  
60 as to inform the design of future interventions.<sup>16-18</sup> The Theoretical Domains Framework (TDF)  
61 has been developed by synthesizing a wide range of theories, and enabling researchers to  
62 investigate a broader range of individual, socio-cultural and environmental behavioral influences  
63 than they would with a single theory alone.<sup>16-18</sup> The TDF has been widely used to explore  
64 barriers and enablers to healthcare professional behaviors, including diagnostic testing,  
65 antimicrobial stewardship, and infection prevention control.<sup>19-22</sup>

66  
67 Here, we aimed to identify barriers and enablers to BC sampling in three middle-income  
68 countries in Southeast Asia (SEA) using a theory-based approach informed by the TDF.  
69 Specifically, we aimed to integrate available evidence by conducting (a) a global systematic  
70 literature review, and (b) a TDF survey among doctors and final-year medical students in  
71 Indonesia, Thailand and Vietnam

## 74 **Methods**

### 75 **Systematic review**

76 We conducted a systematic review by searching five bibliographic databases (PubMed, Ovid  
77 Embase, Scopus, Web of Science, the Cochrane Database of Systematic Reviews and Databases  
78 of Systematic Reviews) for studies evaluating and reporting primary data on barriers/enablers to  
79 BC sampling, published in English between 1 January 1900 to 31 June 2020 (PROSPERO,  
80 CRD42020206557). We used the search terms “blood culture”, “bloodstream infection” or  
81 “diagnostic stewardship”, and “barriers”, “enablers”, “facilitators”, “knowledge”, “attitude” or

82 “practice” (Appendix S1 and S2). We additionally searched the reference list of all relevant  
83 articles to identify additional articles. We included qualitative studies, mixed-method studies,  
84 quantitative descriptive studies, quantitative randomized controlled trials, and quantitative non-  
85 randomized interventional studies.<sup>23</sup>

86  
87 Two investigators (PS and DL) independently screened records for eligible studies based on title  
88 and abstract. Full texts of articles deemed potentially eligible were retrieved and independently  
89 screened by two investigators (PS and DL) for final inclusion. Data were extracted and assessed  
90 using a standardised data abstraction form. Data included study characteristics, sample size,  
91 criteria used to define Theory Domain Frameworks (TDF) domains, and reported  
92 barriers/enablers. Study type was categorized and quality assessment of the evidence was  
93 performed using the Mixed Methods Appraisal Tool (MMAT).<sup>24</sup> In the event of different  
94 conclusions, a third reviewer (LA) adjudicated to determine a conclusion.

95

## 96 **TDF survey**

97 We developed a TDF survey questionnaire, comprising a case scenario and all 14 TDF domains  
98 of barriers/enablers to BC sampling, through an iterative process of several rounds of review,  
99 based on the findings of our systematic literature review, a previous study (included in the  
100 review) which used case scenarios in which BC ordering is strongly recommended by  
101 international guidelines,<sup>13</sup> and previous TDF surveys on other health topics.<sup>25-28</sup> Each question  
102 used a five-point Likert scale representing the level of perceived barriers/enablers to BC  
103 sampling under all TDF domains (Appendix S3).

104

105 The initial questionnaire was translated into Thai, Vietnamese and Indonesian language and  
106 piloted among 3-6 final-year medical students and 10-19 medical doctors in each country (a total  
107 of 54 respondents) to test the clarity of questions and choice answers in each language and to  
108 ensure no potential key barriers/enablers were omitted. We asked respondents to complete the  
109 survey and provide feedback using 1:1 interviews via phone or using online meeting software.  
110 The questionnaire was revised and finalized based on the pilot study results. One free-text  
111 question was added (i.e. Question 6-5, “Additional comments about emotional factors...”  
112 [Appendix S4]), a total of 27 choice answers were added, and languages and wordings were  
113 revised. The final questionnaire included 54 questions about barriers/enablers to BC sampling  
114 and respondents’ demographic characteristics (Appendix S4).

115

116 Based on a sample size calculation for descriptive studies (appendix S1), our enrolment target  
117 was 1500 respondents (100 final-year medical students and 400 medical doctors in each of the  
118 three countries). We used a convenient sampling approach, distributing invitations in letters,  
119 emails, pamphlets and online social media platforms, through existing collaborations in hospitals  
120 and universities in the three survey countries. The online survey was conducted using the  
121 Qualtrics survey platform.

122

123 For the pilot, verbal informed consent was obtained from study respondents prior to  
124 participation. For the TDF survey, electronic informed consent was obtained from study  
125 respondents prior to participation. The study was approved by the Oxford University Tropical  
126 Research Ethics Committee (OXTREC545-21) and local ethical committees at Iskak  
127 Tulungagung Hospital (070/7303/407.206/2021), Prof. Dr. R.D. Kandou Hospital



128 (156/EC/KEPK-KANDOU/IX/2021), Pasar Minggu Hospital (EOCRU/RCH.216/10.2021/1145)  
129 in Indonesia, The National Hospital for Tropical Diseases (14HDDD/NDTU) in Vietnam,  
130 Faculty of Tropical Medicine, Mahidol University (TMEC21-069), Sunpasitthiprasong Hospital  
131 (065/64S) and Chiangrai Prachanukroh Hospital (CR 0032.102/EC023) in Thailand.

132

### 133 **Analysis**

134 For each question, we defined that respondents who answered “definitely”/“likely”, “all the  
135 time”/“often” or “strongly agree”/“agree” perceived the importance or agreement with that  
136 barrier/enabler. The proportion of respondents who answered likewise, after excluding  
137 respondents who answered ‘I do not know’ or ‘I do not want to answer’, was present. Groups  
138 were compared by Chi-squared or Fisher exact tests as appropriate. Logistic regression models  
139 with random effects for countries, for hospital type nested in the same country, and for  
140 professional roles nested in the same hospital type were used to evaluate the association between  
141 respondents’ answers about each barrier/enabler and to the case scenario. Statistical analyses  
142 were performed using Stata 15.1 (StataCorp, US).

143

144 We integrated the results from the systematic review and TDF survey to identify and rank  
145 important TDF domains for Indonesia, Thailand and Vietnam. Each domain identified was  
146 scored on an established set of four ‘importance criteria’ (modified from a previous TDF  
147 study<sup>29</sup>): (1) ‘frequency’ (number of respondents and studies that identified each domain); (2)  
148 ‘elaboration’ (number of themes) within each domain; (3) ‘expressed importance’ (either a  
149 statement from the authors’ interpretation or direct quotes from study respondents expressing

150 importance); and (4) ‘association between reported barriers/enablers and BC practice’ (the  
151 answer to the case scenario was used as a proxy for BC practice).

152

153 Lastly, we mapped identified TDF domains to the COM-B ('capability', 'opportunity',  
154 'motivation' and 'behaviour') model.<sup>16-18</sup> COM-B forms the hub of the Behaviour Change Wheel  
155 (BCW), a framework which signposts to potentially relevant intervention strategies. This  
156 allowed us to list all intervention types and policy options that were likely to be effective in  
157 addressing identified barriers and enablers.

158

### 159 **Role of the funding source**

160 The funders of the study had no role in the study design, data collection, data analysis, data  
161 interpretation, or writing of the report.

162

163

## 164 **Results**

### 165 **Study characteristics**

#### 166 *Systematic review*

167 We identified 6,175 unique records from the databases (Figure 1, Appendix S5). After title and  
168 abstract screening, 884 articles were selected for full-text review. 859 articles were excluded  
169 because they did not meet the eligibility criteria and 25 original studies were included (Appendix  
170 S6). Those studies were conducted in or included participants from 37 HICs and 41 LMICs  
171 (Figure 2, Appendix S7), and comprised 15 (60%) quantitative studies, six (24%) quantitative  
172 non-randomized interventional studies, two (8%) qualitative studies, one mixed-method study,  
173 and one quantitative randomized controlled trial (4% each). Of 25 studies, eight (32%) were

174 judged to be at low risk of bias, 14 (56%) at medium risk of bias and three (12%) at high risk of  
175 bias (Appendix S8).

176

177 The systematic review identified barriers/enablers of BC sampling across 11 of 14 TDF domains.

178 The most common domain reported was ‘knowledge’, followed by ‘behavioural regulation’,

179 ‘environmental context and resources’, ‘memory, attention and decision processes’, ‘beliefs

180 about consequences’ and ‘social influence’ (Table 1). Of 14 TDF domains, three and seven were

181 not assessed in HICs and LMICs by the studies included in the systematic review, respectively

182 (Appendix S9).

183

#### 184 ***TDF survey***

185 From 1 December 2021 to 30 April 2022, 1,070 medical doctors and 238 final-year medical

186 students in Indonesia, Thailand and Vietnam completed the online TDF survey covering all 14

187 TDF domains. Half of respondents were female (n=680, 52%) and most worked in governmental

188 hospitals (n=980, 75.4%) (Table 2). The most common department was internal medicine

189 (n=450, 34.4%), followed by emergency (n=175, 13.4%) and pediatrics (n=153, 11.7%).

190 Respondents were from 24 of 34 provinces in Indonesia, 39 of 77 provinces in Thailand, and 25

191 of 63 provinces in Vietnam.

192

193 Based on the sepsis case scenario (Table 2), half of respondents (52.3%, 682/1,304) answered

194 that they would definitely take BC. However, the responses were significantly different between

195 the three countries (p<0.001). Most Thai respondents (89.8%, 273/304) answered that they

196 would definitely take BC, while only half of Vietnamese respondents (50.5%, 252/499) and  
197 about a third of Indonesian respondents (31.3%, 157/501) did.

198

### 199 **Thematic synthesis for domains identified as having high importance**

200 We combined the results obtained from the systematic review and the TDF survey (Table 1 and  
201 Appendix S10), and present content themes, in rank order, within each of the eight domains that  
202 were considered very important (i.e. key) in the three countries in SEA in the section below, with  
203 example references and quotes (Table 3).

204

#### 205 ***Knowledge***

206 *Theme. Awareness of guidelines.* In the review, “lack of knowledge of existing guidelines” was  
207 reported as a key barrier to BC sampling.<sup>13</sup> In our survey, 59.0% (756/1,282) of respondents  
208 answered that they know of guidelines for BC sampling being used in their hospitals, while  
209 29.3% (376/1,282) answered that they do not know if their hospitals use any guidelines, and  
210 11.7% (150/1,282) answered that their hospitals do not use any guidelines (Appendix S11).  
211 Among those who answered that they know of local guidelines, 81.0% (612/756) stated that their  
212 local guidelines recommend BC sampling in all patients presenting with sepsis. About half  
213 (47.8%, 596/1,248) answered that they know of international guidelines, and most of those  
214 (95.0%, 566/596) stated that the international guidelines recommend BC sampling in all patients  
215 presenting with sepsis. Respondents who answered that they know of local guidelines (odds ratio  
216 [OR] 2.55, 95% confidence interval [CI] 1.93-3.38,  $p < 0.001$ ) or international guidelines (OR  
217 1.97, 95%CI 1.50-2.57,  $p < 0.001$ ) were more likely to answer with “definitely take BC” in the  
218 case scenario (Appendix S12).

219

220 *Theme: BC-related knowledge.* In the review, previous studies reported deficiencies in BC-  
221 related knowledge, i.e. the number of BC bottles to be collected, amount of blood volume needed  
222 be collected, temperature of BC incubation, necessity of aseptic techniques and impact of  
223 antibiotics prior to BC collection.<sup>12,15,30</sup> Our survey did not assess BC-related knowledge as this  
224 study did not focus on quality of BC practice.

225  
226 *Theme: Training.* In the review ‘lack of training’ on BC was commonly reported as a  
227 barrier.<sup>15,31,32</sup> In our survey, 37.8% (153/407) of Indonesian respondents, 24.9% (64/257) of Thai  
228 respondents and 12.4% (52/421) of Vietnamese respondents responded that there were no  
229 training, lectures, classes or meetings that provide knowledge about local/national/international  
230 guidelines for BC sampling in their hospitals (p<0.001). Respondents who answered that there  
231 are training, lectures, classes or meetings that provide knowledge about guidelines for BC  
232 sampling were more likely to answer with “definitely take BC” in the case scenario (OR 1.68;  
233 95% CI 1.18-2.38, p=0.004).

234

### 235 ***Goals***

236 *Theme: Priority of BC.* In the review, “low priority attributed to BC” was reported as a key  
237 barrier to BC sampling. However, “lack of time” or “time constraints” is commonly used to  
238 represent “low priority to BC” in the working environment with similar work density in  
239 hospitals.<sup>13,32</sup> In many settings, ordering or initiating an order for BC can take only few seconds  
240 by writing “blood culture” in the doctor order form. In our survey, we used a question asking  
241 about the priority of BC compared to that of empirical antibiotics. 91.3% (274/300) of Thai  
242 respondents answered that they obtain BC prior to receiving empirical antibiotics in patients

243 presenting with sepsis all the time or often, while 80.0% (380/475) of Vietnamese respondents  
244 and 54.2% (251/463) of Indonesian respondents answered likewise ( $p < 0.001$ ). Respondents who  
245 gave priority to BC were more likely to answer with “definitely take BC” in the case scenario  
246 (OR 4.25, 95%CI 3.04-5.94,  $p < 0.001$ ).

247

## 248 ***Intention***

249 *Theme: Intention to follow guidelines.* In the review, “low intrinsic motivation”<sup>13</sup> and “general  
250 reluctance to draw large volumes of blood”<sup>33</sup> were reported as barriers to BC sampling. In our  
251 survey, among those who answered that they know of local guidelines, 92.9% (157/169) of Thai  
252 respondents answered that they plan to follow local guidelines all the time or often, while 82.0%  
253 (283/345) of Vietnamese respondents and 74.1% (172/232) of Indonesian respondents answered  
254 likewise. Those respondents were more likely to answer with “definitely take BC” in the case  
255 scenario (OR 2.92, 95% CI 1.88-4.53,  $p < 0.001$ ).

256

## 257 ***Social professional role and identity***

258 *Theme: Level of doctors who can order or initiate an order for BC.* In the review, a survey  
259 evaluated the role of nurses to decide on BC testing in HICs,<sup>32</sup> but none of the studies included  
260 evaluated the role of different levels of doctors on BC sampling. In our survey, >75% of Thai  
261 respondents answered that all levels of medical doctors (consultants, physicians, residents and  
262 interns) can order or initiate an order for BC in their hospitals. Most Indonesian and Vietnamese  
263 respondents (87.9%, 870/990) answered that consultants can, but fewer answered that physicians  
264 (61.8%, 612/990), residents (59.1%, 585/990) and interns (20.3%, 201/990) can ( $p < 0.001$ ). A  
265 quarter of Thai respondents (28.7%, 87/303) answered that final-year medical students can order

266 or initiate an order for BC under supervision of attending medical doctors, while Indonesian  
267 respondents (2.2%, 11/500) and Vietnamese respondents (0.6%, 3/490) rarely answered likewise  
268 ( $p < 0.001$ ). None reported that nurses can order or initiate an order for BC.

269  
270 *Theme: Perception about their role to order or initiate an order for BC.* In the review, ‘lack of  
271 perceived responsibility’ was reported as a barrier from final-year medical students, but not from  
272 medical doctors.<sup>13</sup> In our survey, most medical doctors (86.5%, 905/1,046) answered that it is  
273 very appropriate or appropriate for them to order BC or initiate an order for BC, while only about  
274 half of final-year medical students (49.8%; 115/231) answered likewise ( $p < 0.001$ ). Those  
275 respondents were more likely to answer with “definitely take BC” in the case scenario (OR 3.36,  
276 95% CI 2.50-4.51,  $p < 0.001$ ).

277  
278 *Theme: perception about their role to draw blood for BC.* In our survey, most respondents  
279 (72.8%, 949/1,303) answered that registered nurses are tasked to draw blood from patients for  
280 BC, followed by microbiology laboratory team (36.0%, 469/1,303), specialized blood draw team  
281 (27.4%, 357/1,303), residents (25.4%, 331/1,303), physicians (23.5%, 306/1,303), consultants  
282 (23.2%, 302/1,303), interns (17.8%, 229/1,303) and final-year medical students (11.6%,  
283 151/1,303). Of respondents who answered that they are tasked to draw blood from patients for  
284 BC, 69.1% (248/359) responded that it is very appropriate or appropriate for their role to draw  
285 blood for BC. Those respondents were more likely to answer with “definitely take BC” in the  
286 case scenario (OR 1.94, 95% CI 1.04-3.64,  $p = 0.04$ ).

287

288 ***Social influence***

289 *Theme: Norms of BC sampling.* In the review, ‘lack of norms’ and ‘routine sampling’ were  
290 reported as important barriers<sup>13</sup> and enablers<sup>34,35</sup> to BC sampling. In our survey, 78.5% (233/297)  
291 of Thai respondents answered that they order BC because they are following local norms all the  
292 time or often, while 51.5% (238/462) of Vietnamese respondents and 43.8% (180/411) of  
293 Indonesian respondents answered likewise ( $p<0.001$ ). Those respondents were more likely to  
294 answer with “definitely take BC” in the case scenario (OR 2.20, 95%CI 1.67-2.90,  $p<0.001$ ).

295

296 *Theme: Influences from healthcare workers, patients and family of patients.* In the review, none  
297 of the studies included assessed the influences from other healthcare workers, patients or family  
298 of patients for BC sampling. In our survey, most respondents (79.4%) answered that there are  
299 very positive or positive influences on BC sampling from consultants, followed by residents  
300 (64.5%), doctors (64.6%), heads of department (65.9%), executive levels (50.6%), nurses  
301 (47.6%), interns (45.2%), patients (43.0%) and family of patients (31.9%). Some respondents  
302 said that there are negative or very negative influence in BC sampling from family of patients  
303 (6.8%), nurses (5.2%), patients (4.3%) and executives of the hospital (3.6%). Numerous quotes  
304 on this theme as a barrier were noted (Table 3).

305

### 306 ***Environmental context and resources***

307 *Theme: Perceived cost-effectiveness of BC.* In the survey, ‘cost of BC’ or ‘economic pressure’  
308 was reported as a barrier to BC sampling in both HICs<sup>12,13,32,36</sup> and LMICs.<sup>14</sup> In our survey, most  
309 (78.0%, 950/1,218) respondents considered that BC is very likely or likely to be cost-effective.  
310 Those respondents were more likely to answer with “definitely take BC” in the case scenario  
311 (OR 1.63, 95%CI 1.17-2.26,  $p<0.001$ ).



312

313 *Theme: Availability of microbiology laboratories, transport modalities, resources and*  
314 *consumables.* In the review, unavailability of laboratories,<sup>8</sup> logistical barriers,<sup>8</sup> lack of BC  
315 bottles<sup>14,37</sup> and limited human and resources<sup>8</sup> were reported as barriers to BC sampling. In our  
316 survey, some respondents could not order BC because microbiology laboratories are not  
317 available or not functioning (13.4%, 157/1,174) or consumables (such as BC bottles, needles,  
318 syringes, blood collection set, etc.) are not available (12.7%, 150/1,181) all the time or often.  
319 Those respondents were not associated with BC practice in the case scenario ( $p>0.20$  both)

320

321 *Theme: Out-of-pocket.* In the review, “cost consideration for the patients” was reported as a  
322 barrier to BC sampling.<sup>14</sup> In the TDF survey, 23.3% (78/335) of Indonesian respondents  
323 answered that patients have to pay for BC using their own money (i.e. out of pocket) all the time  
324 or often, while 12.2% (28/230) of Thai participant and 8.3% (34/408) of Vietnamese participant  
325 answered likewise ( $p<0.001$ ). Those respondents were not associated with BC practice in the  
326 case scenario ( $p=0.29$ )

327

### 328 ***Behavioural regulation***

329 *Theme: Regulation of cost reimbursement.* In the review, “cost reimbursement” was reported as  
330 barriers to BC sampling.<sup>8</sup> In our survey, 15.0% (196/1,308) and 11.6% (152/1,308) of  
331 respondents stated that ‘whether patients have a health scheme or insurance that covers the cost  
332 of BC’ and that ‘whether patients are likely to have a final diagnosis that includes the cost of BC  
333 in the package of fee for service’ are their additional reasons for deciding to order BC,

334 respectively. Those respondents were not associated with BC practice in the case scenario  
335 ( $p > 0.20$ , both). However, numerous quotes on this theme were noted (Table 3).

336

337 *Theme: Procedures to support or regulate doctors to order BC.* Interventional studies used  
338 development and dissemination of local guidelines, posters, notifications (i.e. feedback) and  
339 computer systems to support doctors to order BC per guidelines.<sup>38-43</sup> In our survey, the most  
340 common procedures to support or regulate doctors to order BC in their hospitals was presence of  
341 local hospital guidelines (33.2%, 352/1,060), followed by case reviews (e.g. grand rounds or  
342 morning ward rounds, and BC is often mentioned) (30.8%, 326/1,060), standard order forms to  
343 remind ordering BC (29.9%, 317/1,060), stewardship programmes and reviewing BC is included  
344 in the programmes (19.5%, 207/1,060), posters (15.4%, 163/1,060) and computer systems to  
345 remind ordering BC (10.7%, 113/1,060). Respondents who answered that there are local hospital  
346 guidelines were more likely to answer with “definitely take BC” in the case scenario (OR 1.45;  
347 95% CI 1.06-1.99,  $p = 0.006$ ).

348

### 349 ***Reinforcement***

350 *Theme: Consequences that discourage BC sampling.* In the review, none of the studies included  
351 assessed reinforcement. In our survey, if they order a BC when it is recommended, some  
352 respondents (23.1%, 284/1,231) answered that there are either negative social consequences (e.g.  
353 verbal reprimand or any pressure from supervisors/executives of the hospital as the hospital  
354 (may) have to pay for the (extra) cost of BC) or negative material consequences (e.g. a negative  
355 score, that doctors are at risk of having to spend extra time and effort to reimburse the cost of BC  
356 from any health scheme or insurance, or that doctors are at risk of having to pay for the [extra]

357 cost of BC themselves). Those who answered that there are negative consequences were less  
358 likely to answer with “definitely take BC” in the case scenario (OR 0.48; 95%CI 0.34-0.67,  
359  $p<0.001$ ).

360

361 *Theme: Consequences that encourage BC sampling.* In the survey, 23.7% (294/1,243) of  
362 respondents answered that there are either positive social (e.g. praise) or positive material (e.g. a  
363 positive score) consequences if they order a BC when it is recommended. Those respondents  
364 were less likely to answer with “definitely take BC” in the case scenario (OR 0.53; 95%CI 0.37-  
365 0.74,  $p<0.001$ ). Nonetheless, we found that respondents who answered that there are positive  
366 consequences that encourage BC sampling when recommended were also answered that there are  
367 negative consequences that discourage BC sampling when recommended with moderate  
368 agreement beyond that expected by chance (Kappa value 0.46,  $p<0.001$ ).

369

370 We also evaluated whether they are negative consequences if practitioners do not order a BC  
371 when it is recommended. 37.7% (464/1,230) of respondents answered that there are either  
372 negative social (e.g. verbal reprimand) or negative material (e.g. a negative score) consequences  
373 if they do not order a BC when it is recommended. Those respondents were not associated with  
374 answering with “definitely order BC” in the case scenario ( $p=0.42$ ).

375

376 Additional results and the content themes in the domains that were identified as important in  
377 influencing in BC sampling are described in Appendix S1.

378

379 **Intervention types and policy options to improve BC sampling practice**

380 We used the links between TDF and BCW, and listed all suggested intervention types and policy  
381 options related to very important TDF domains in Indonesia, Thailand and Vietnam (Table 4). A  
382 range of potential strategies were identified. Some strategies target individual reinforcement,  
383 environmental structure and social influence (e.g. providing an example for physicians to aspire  
384 to or imitate the BC sampling practice [modelling] and increasing means and reducing barriers to  
385 increase capability and opportunity to order BC for all levels of doctors [enablement]). Some  
386 strategies operate at the policy or service provision level (e.g. changing regulation of cost  
387 reimbursement [fiscal], development or implementation of local guidelines [guideline] and  
388 establishing rules or principles of BC practice [regulation]).

389

390

## 391 **Discussion**

392 Our review shows that the existing global evidence on barriers and enablers to BC sampling is  
393 limited, particularly for LMICs, and does not allow for drawing firm conclusions. Our survey in  
394 Indonesia, Thailand and Vietnam shows that ‘no awareness of guideline [TDF-knowledge]’,  
395 ‘low priority of BC [TDF-goals]’, ‘no intention to follow guidelines [TDF-intention]’, ‘level of  
396 doctors who can order or initiate an order for BC [TDF-social professional role and identity]’,  
397 ‘no norms of BC sampling [TDF-social influence]’, ‘perceived cost-effectiveness of BC [TDF-  
398 environmental context and resources]’, ‘regulation on cost reimbursement [TDF-behavioural  
399 regulation]’ and ‘consequences that discourage BC sampling [TDF-reinforcement]’ appeared to  
400 be key in influencing BC sampling. In Thailand,<sup>10</sup> where BC utilization rate is relatively high  
401 compared to Indonesia<sup>9</sup> and Vietnam,<sup>11</sup> the frequencies of each barrier being reported by  
402 respondents is lower for most domains.

403

404 ‘Low priority to BC [TDF-goals]’, ‘no intention to follow guidelines [TDF-intention]’, ‘lack of  
405 perception about their role to order or initiate an order for BC [TDF-social professional role and  
406 identity]’ and ‘lack of norms of BC sampling [TDF-social influence]’ are likely key barriers to  
407 BC sampling in both HICs<sup>13,36,44</sup> and other LMICs<sup>33</sup> where resources for BC sampling are  
408 available to some extent.

409

410 To our knowledge, ‘level of doctors who can order or initiate an order for BC [TDF-social  
411 professional role and identity]’ and ‘influence from healthcare workers, patients and families of  
412 patients [TDF-social influence]’ have never been systematically evaluated and reported as a  
413 barrier to BC sampling. Those are important barriers as, in many hospitals in both HICs and  
414 LMICs, final-year medical students and interns are responsible for most BC ordering and  
415 acquisition<sup>30</sup> and influences from other parties can discourage BC sampling.

416

417 Remarkably, the cost of BC seems to have influence on executive level doctors, patients,  
418 families of patients, or those who set regulations on cost reimbursement of BC. This is shown by  
419 many quotes related to the cost of BC in the theme ‘influences from healthcare workers, patients  
420 and family of patients [TDF-social influence]’, ‘regulation on cost reimbursement [TDF-  
421 behavioural regulation]’ and ‘consequences that discourage BC sampling [TDF-reinforcement]’,  
422 respectively (Table 3). All stakeholders in each study country will need to consider all suggested  
423 intervention functions and policy options (e.g. providing clear posters emphasizing local  
424 guidelines of BC sampling over wide areas in hospitals to reduce negative influences from other  
425 parties on BC practice [environmental restructuring], changing regulation of cost reimbursement  
426 and finding financial support for BC sampling per local guidelines [fiscal], repeatedly

427 announcing to all levels of healthcare workers that negative consequences that discourage BC  
428 sampling per local guidelines will not be tolerated [enablement] for cost-related barriers), and  
429 develop intervention content in details based on local context for the changes of BC practice to  
430 be successful.<sup>16-18,45</sup>

431  
432 This study also has several limitations. First, the systematic review was limited in scope and  
433 quality due to limitation and heterogeneity of studies included. The TDF survey included a  
434 convenient sample of hospitals and practitioners, which might have led to selection bias. This  
435 limited our ability to draw firm conclusions on the contemporary situation on barriers and  
436 enablers to BC sampling globally and in the SEA region. Therefore, the data should be  
437 interpreted cautiously. Second, the exclusion of non-peer-reviewed and non-English literature  
438 meant that we might not have included local publications and documents from local government  
439 and/or non-government institutions. However, their exclusion likely improved the quality of the  
440 evidence as those literature may not always follow gold-standard or recommended guidelines for  
441 evaluation. Third, the survey could not reach the target sample size in Thailand despite  
442 substantial efforts. Nonetheless, the study had enough power to estimate the prevalence of  
443 barriers and enablers in Thailand, and compare that with those observed in Indonesia and  
444 Vietnam.

445  
446 In conclusion, among three LMICs in SEA barriers to BC sampling were varied and  
447 heterogeneous. This comprehensive analysis using TDF gives information across the entire  
448 spectrum of behavioral influences of BC sampling. These results can help local healthcare

449 providers and policy makers to develop and implement interventions aiming to improve

450 diagnostic stewardship practices.

451

452

453 *Declaration of interests*

454 The authors declare no competing financial interests.

455

456 *Data sharing*

457 The study protocol for the systematic review, with all relevant tools, is publicly available in

458 PROSPERO, CRD42020206557. All produced in the present study are available upon

459 reasonable request to the corresponding author.

460

461 *Acknowledgments*

462 The authors thank the respondents and staff at all the study hospitals and Mahidol-Oxford

463 Tropical Medicine Research Unit. The authors thank Surveillance and Epidemiology of Drug-

464 resistant Infections Consortium (SEDRIC) for the support and comments on the study. We thank

465 Le Nguyen Minh Hoa, Vu Minh Duy Pharm, Dam Thi Hong Hanh and Hoang Bao Long for

466 support in data collection. This research was funded by the Wellcome Trust (220557/Z/20/Z).

467 For the purpose of Open Access, the author has applied a CC BY public copyright licence to any

468 Author Accepted Manuscript version arising from this submission.

469

470 *Author contributions*

471 F.L., L.A. and D.L. designed and supervised the study. P.S., K.S.A., R.L., V.T.L.H., H.R.v.D.

472 and R.L.H. participated in project design and facilitated data collection. A.T., L.W.A.R., R.B.,

473 E.J.N., D.U.N., S.K., W.S., P.C., W.P., N.H.Y., P.N.T., L.M.Q., V.H.V., C.M.D., V.T.H.D.E.

474 and E.H. facilitated data collection. P.S. analyzed the data and wrote the first draft of the



475 manuscript. All authors contributed to the writing or revision of the manuscript. P.S. and D.L.

476 verified the data.

477

478

479 *Table 1: Barriers and enablers of the 14 domains of the Theoretical Domains Framework (TDF) identified through the systematic*  
 480 *review of the global evidence and the TDF survey in Indonesia, Thailand and Vietnam*

| Theoretical Domains Framework (TDF) domains* | Systematic review of the global evidence |                    |                    |                   | TDF survey in Indonesia, Thailand and Vietnam |                     |
|----------------------------------------------|------------------------------------------|--------------------|--------------------|-------------------|-----------------------------------------------|---------------------|
|                                              | Frequency (N=study)                      | Barriers (N=study) | Enablers (N=study) | Mixed** (N=study) | Barriers                                      | Enablers            |
| Knowledge                                    | 17                                       | 5                  | 6                  | 6                 | Yes, very important                           | Yes, very important |
| Goals                                        | 3                                        | 2                  | 1                  | 0                 | Yes, very important                           | Yes, very important |
| Intentions                                   | 2                                        | 1                  | 0                  | 1                 | Yes, very important                           | Yes, very important |
| Social professional role and identity        | 2                                        | 1                  | 1                  | 0                 | Yes, very important                           | Yes, very important |
| Social influences                            | 6                                        | 1                  | 5                  | 0                 | Yes, very important                           | Yes, very important |
| Environmental context and resources          | 11                                       | 3                  | 2                  | 6                 | Yes, very important                           | Yes, very important |
| Behavioural regulation                       | 15                                       | 1                  | 6                  | 6                 | Yes, very important                           | Yes, very important |
| Reinforcement                                | Not evaluated                            | Not evaluated      | Not evaluated      | Not evaluated     | Yes, very important                           | Yes, very important |
| Beliefs about consequences                   | 6                                        | 4                  | 0                  | 2                 | Yes                                           | Yes                 |
| Memory, attention and decision processes     | 10                                       | 1                  | 7                  | 2                 | Yes                                           | Yes                 |
| Optimism                                     | Not evaluated                            | Not evaluated      | Not evaluated      | Not evaluated     | Yes                                           | Yes                 |
| Skills                                       | 1                                        | 0                  | 0                  | 1                 | Yes                                           | Yes                 |
| Beliefs about capabilities                   | 1                                        | 0                  | 1                  | 0                 | Yes                                           | Yes                 |
| Emotion                                      | Not evaluated                            | Not evaluated      | Not evaluated      | Not evaluated     | Yes                                           | No                  |

481  
 482 \* TDF Domains are in rank order from most important to least important in Indonesia, Thailand and Vietnam. \*\*Mixed = Mixed barriers and enablers  
 483

484 *Table 2: Demographics and answer to the case scenario - the TDF survey*

| Variables                                                                                                        | Indonesia (n=503) | Thailand (n=304) | Vietnam (n=501) | P values |
|------------------------------------------------------------------------------------------------------------------|-------------------|------------------|-----------------|----------|
| <b>Female gender</b>                                                                                             | 263 (52.3%)       | 195 (64.1%)      | 222 (44.3%)     | <0.001   |
| <b>Hospital types</b>                                                                                            |                   |                  |                 |          |
| Government hospital                                                                                              | 340 (67.6%)       | 209 (68.8%)      | 431 (86.0%)     | <0.001   |
| Private hospital                                                                                                 | 113 (22.5%)       | 15 (4.9%)        | 17 (3.4%)       |          |
| University hospital                                                                                              | 26 (5.2%)         | 76 (25.0%)       | 29 (5.8%)       |          |
| Other <sup>1</sup>                                                                                               | 19 (3.8%)         | 2 (0.7%)         | 22 (4.4%)       |          |
| I do not want to answer                                                                                          | 5 (1.0%)          | 2 (0.7%)         | 2 (0.4%)        |          |
| <b>Hospital bed size</b>                                                                                         |                   |                  |                 |          |
| <200                                                                                                             | 99 (19.7%)        | 35 (11.5%)       | 24 (4.8%)       | <0.001   |
| 201-400                                                                                                          | 107 (21.3%)       | 46 (15.1%)       | 29 (5.8%)       |          |
| 401-600                                                                                                          | 72 (14.3%)        | 39 (12.8%)       | 62 (12.4%)      |          |
| 601-1,000                                                                                                        | 66 (13.1%)        | 45 (14.8%)       | 144 (28.7%)     |          |
| 1,001-2,000                                                                                                      | 39 (7.8%)         | 82 (27.0%)       | 125 (25.0%)     |          |
| >2,000                                                                                                           | 27 (5.4%)         | 30 (9.9%)        | 74 (14.8%)      |          |
| I do not know                                                                                                    | 89 (17.7%)        | 27 (8.9%)        | 35 (7.0%)       |          |
| I do not want to answer                                                                                          | 4 (0.8%)          | 0 (0%)           | 8 (1.6%)        |          |
| <b>Current job<sup>2</sup></b>                                                                                   |                   |                  |                 |          |
| Medical doctor – executive level                                                                                 | 13 (2.6%)         | 5 (1.6%)         | 17 (3.4%)       | <0.001   |
| Medical doctor – consultant level                                                                                | 74 (14.7%)        | 75 (24.7%)       | 198 (39.5%)     |          |
| Medical doctor – physician level                                                                                 | 124 (24.7%)       | 38 (12.5%)       | 112 (22.4%)     |          |
| Medical doctor – resident level                                                                                  | 168 (33.4%)       | 63 (20.7%)       | 101 (20.2%)     |          |
| Medical doctor – intern level                                                                                    | 33 (6.6%)         | 35 (11.5%)       | 14 (2.8%)       |          |
| Final-year medical student                                                                                       | 91 (18.1%)        | 88 (28.9%)       | 59 (11.8%)      |          |
| <b>Department</b>                                                                                                |                   |                  |                 |          |
| Internal medicine                                                                                                | 149 (29.6%)       | 155 (51.0%)      | 146 (29.1%)     | <0.001   |
| Pediatrics                                                                                                       | 65 (12.9%)        | 43 (14.1%)       | 45 (9.0%)       | 0.05     |
| Infection disease division/department                                                                            | 12 (2.4%)         | 5 (1.6%)         | 56 (11.2%)      | <0.001   |
| Surgery                                                                                                          | 21 (4.2%)         | 45 (14.8%)       | 81 (16.2%)      | <0.001   |
| Orthopaedics                                                                                                     | 6 (1.2%)          | 18 (5.9%)        | 14 (2.8%)       | 0.001    |
| Obstetrics / Gynaecology                                                                                         | 20 (4.0%)         | 29 (9.5%)        | 7 (1.4%)        | <0.001   |
| Emergency department                                                                                             | 112 (22.3%)       | 34 (11.2%)       | 29 (5.8%)       | <0.001   |
| Intensive care unit                                                                                              | 45 (8.9%)         | 13 (4.3%)        | 51 (10.2%)      | 0.01     |
| <b>Case-study: Would you take a BC sample in a case presenting with community-acquired sepsis?<sup>3,4</sup></b> |                   |                  |                 |          |
| Definitely (>95-100% of the time)                                                                                | 157 (31.2%)       | 273 (89.8%)      | 252 (50.3%)     | <0.001   |
| Likely (75-95% of the time)                                                                                      | 138 (27.4%)       | 23 (7.6%)        | 149 (29.7%)     |          |
| Maybe (25-74% of the time)                                                                                       | 116 (23.1%)       | 5 (1.6%)         | 70 (14.0%)      |          |
| Unlikely (5-24% of the time)                                                                                     | 44 (8.7%)         | 2 (0.7%)         | 19 (3.8%)       |          |
| Rarely (ranging from never to <5% of the time)                                                                   | 46 (9.1%)         | 1 (0.3%)         | 9 (1.8%)        |          |
| I do not know                                                                                                    | 1 (0.2%)          | 0 (0%)           | 1 (0.2%)        |          |
| I do not want to answer                                                                                          | 1 (0.2%)          | 0 (0%)           | 1 (0.2%)        |          |

485  
 486 See Appendix S4 for the questionnaire and Appendix S11 for the complete results of the TDF survey. <sup>1</sup> Included  
 487 clinics (n=3) and text answers that could not be used to determine the hospital type such as internship and medical  
 488 students. <sup>2</sup> In the survey, for a medical doctor, ‘executive level’ was defined as having an administrative position  
 489 without clinical work, ‘consultant’ was defined as having a clinical specialty degree, ‘resident’ as currently under  
 490 postgraduate clinical training, ‘physician’ as having no clinical specialty/subspecialty degree and not under  
 491 postgraduate clinical training, and ‘intern’ as a recent medical school graduate in the first year of post-graduate on-  
 492 the-job training. <sup>3</sup> In the survey, for the questions asking “Would you ...” or “How often ...”, the Likert scale  
 493 options were defined as ‘definitely’ or ‘all the time’ (reflecting >95-100% of the time or case, respectively), ‘likely’

494 or 'often' (75-95%), 'uncertain' or 'moderately' (25-74%), 'unlikely' or 'occasionally' (5-24%), and 'rarely' (<5%).  
495 Each question also included 'I do not know' and 'I do not want to answer' options.<sup>4</sup> Case scenario. "A 72-year-old  
496 woman who was brought to the emergency department of your hospital by her daughter when she noticed the patient  
497 was more confused than her baseline and was found to have a high fever and fast breathing. She had an auscultatory  
498 finding compatible with pneumonia. It is decided that this patient will be admitted to your hospital." If you have an  
499 authority to take a blood culture, would you take blood culture sample(s) in this case on admission?

500 *Table 3: Sample quotes derived from the systematic review of the global evidence and the TDF survey in Indonesia, Thailand and*  
 501 *Vietnam*

| TDF Domains                           | Themes                                                     | Systematic review for the global evidence                                                                                                                                                                                                                                                                                                                                                                                                                                       | TDF survey in Indonesia, Thailand and Vietnam                                                                                                                                                                  |
|---------------------------------------|------------------------------------------------------------|---------------------------------------------------------------------------------------------------------------------------------------------------------------------------------------------------------------------------------------------------------------------------------------------------------------------------------------------------------------------------------------------------------------------------------------------------------------------------------|----------------------------------------------------------------------------------------------------------------------------------------------------------------------------------------------------------------|
| Knowledge                             | Awareness of guidelines                                    | <ul style="list-style-type: none"> <li>• “13.3% of all participants indicated not to know the guidelines (for BC ordering and sampling) in detail.” (Statistic data, Raupach-Rosin, H. 2017 [barrier])<sup>13</sup></li> </ul>                                                                                                                                                                                                                                                  |                                                                                                                                                                                                                |
|                                       | BC-related knowledge                                       | <ul style="list-style-type: none"> <li>• “We identified important deficiencies in BC-related knowledge among all specialties and at all levels of training (including medical students), apart from infectious diseases physicians.” (Author interpreted summary, Parada, JP. 2005 [barrier])<sup>30</sup></li> </ul>                                                                                                                                                           |                                                                                                                                                                                                                |
|                                       | Training                                                   | <ul style="list-style-type: none"> <li>• “Seventy-seven percent of hospitals provided training on proper collection of BCs, mainly using 1-on-1 education sessions (60%).” (Statistic data, Garcia RA, 2017 [enabler])<sup>31</sup></li> </ul>                                                                                                                                                                                                                                  | <ul style="list-style-type: none"> <li>• “I have not learnt about the local recommendation for BC sampling in my university hospital.” (TDF-IND [barrier]).</li> </ul>                                         |
| Goal                                  | Priority of BC                                             | <ul style="list-style-type: none"> <li>• “BC diagnostics is not treated with priority.” (author interpreted summary, Raupach-Rosin, H. 2017 [barrier])<sup>13</sup></li> <li>• “74% provide and 26% did not provide information regarding the order of draw for BCs when orders for multiple tests on a patient are indicated.” (summary statistic, Garcia RA, 2017 [enabler and barrier])<sup>31</sup></li> </ul>                                                              | <ul style="list-style-type: none"> <li>• “If other urgent examinations are to be required, BC could be delayed.” (TDF-VN [barrier]).</li> </ul>                                                                |
| Intention                             | Intention to follow guidelines                             | <ul style="list-style-type: none"> <li>• “Half of the participants (50.6%) stated to follow existing guidelines in at least 75% of the cases” and “Low intrinsic motivation for taking BC” (Summary statistic and author interpreted summary, respectively, Raupach-Rosin, H. 2017 [enabler and barrier])<sup>13</sup></li> <li>• “General reluctance to draw large volumes of blood (for BC)” (Author interpreted summary, Dailey, PJ. 2019 [barrier])<sup>33</sup></li> </ul> |                                                                                                                                                                                                                |
| Social professional role and identity | Level of doctors who can order or initiate an order for BC |                                                                                                                                                                                                                                                                                                                                                                                                                                                                                 | <ul style="list-style-type: none"> <li>• “Medical students can order BC; however, medical students must have a signature of a supervising medical doctor together all the time.” (TDF-TH [enabler])</li> </ul> |
|                                       | Perception about their role                                | <ul style="list-style-type: none"> <li>• “Lack of perceived responsibility” reported as a barrier from final-year medical students, but not from medical</li> </ul>                                                                                                                                                                                                                                                                                                             |                                                                                                                                                                                                                |

| TDF Domains                         | Themes                                                                                     | Systematic review for the global evidence                                                                                                                                                                                                                                                                                                                                                                                         | TDF survey in Indonesia, Thailand and Vietnam                                                                                                                                                                                                                                                                                                                                                                                                                                                                                                                                                                                                                                                                                                                                                                                                                                  |
|-------------------------------------|--------------------------------------------------------------------------------------------|-----------------------------------------------------------------------------------------------------------------------------------------------------------------------------------------------------------------------------------------------------------------------------------------------------------------------------------------------------------------------------------------------------------------------------------|--------------------------------------------------------------------------------------------------------------------------------------------------------------------------------------------------------------------------------------------------------------------------------------------------------------------------------------------------------------------------------------------------------------------------------------------------------------------------------------------------------------------------------------------------------------------------------------------------------------------------------------------------------------------------------------------------------------------------------------------------------------------------------------------------------------------------------------------------------------------------------|
|                                     | to order or initiate an order for BC.                                                      | doctors (Author interpreted summary, Raupach-Rosin, H. 2017 [barrier]) <sup>13</sup>                                                                                                                                                                                                                                                                                                                                              |                                                                                                                                                                                                                                                                                                                                                                                                                                                                                                                                                                                                                                                                                                                                                                                                                                                                                |
|                                     | Perception about their role to draw blood for BC                                           |                                                                                                                                                                                                                                                                                                                                                                                                                                   |                                                                                                                                                                                                                                                                                                                                                                                                                                                                                                                                                                                                                                                                                                                                                                                                                                                                                |
| Social influence                    | Norms of BC sampling                                                                       | <ul style="list-style-type: none"> <li>“High routine in BC sampling” and “Lack of routine (in BC sampling)” were identified as enablers and barriers for BC sampling. (Author interpreted summary, Raupach-Rosin, H. 2017 [enabler and barrier])<sup>13</sup></li> </ul>                                                                                                                                                          |                                                                                                                                                                                                                                                                                                                                                                                                                                                                                                                                                                                                                                                                                                                                                                                                                                                                                |
|                                     | Influences from healthcare workers, patients and family of patients                        |                                                                                                                                                                                                                                                                                                                                                                                                                                   | <ul style="list-style-type: none"> <li>“The patient's families often have a strong influence on patients. They often decide not to provide consent to BC.” (TDF-IND [barrier])</li> <li>“Negative influence in the order of BC is cost. Supervisor or the executives (of the hospitals) gave an order to control the cost.” (TDF-TH [barrier])</li> <li>“The patient's relatives are not satisfied with the cost of (BC) testing.” (TDF-VN [barrier]).</li> <li>“Because people do not understand, when ordering BC, they often complain.” (TDF-VN [barrier])</li> <li>“Some patients think that physicians and other healthcare workers only perform BC examinations for money.” (TDF-IND [barrier]).</li> <li>“Sometimes, when the blood puncture fails on the first try, patients and their families refuse to collect more blood samples.” (TDF-IND [barrier]).</li> </ul> |
| Environmental context and resources | Perceived cost-effectiveness of BC                                                         | <ul style="list-style-type: none"> <li>“37% of participants in the Germany and US stated that cost of BC (against the BC performance) was acceptable.” (statistical data, She, RC. 2015 [enabler])<sup>12</sup></li> </ul>                                                                                                                                                                                                        | <ul style="list-style-type: none"> <li>“BC is still not cost-effective for my hospital” (TDF-IND [barrier]).</li> </ul>                                                                                                                                                                                                                                                                                                                                                                                                                                                                                                                                                                                                                                                                                                                                                        |
|                                     | Availability of microbiology laboratories, transport modalities, resources and consumables | <ul style="list-style-type: none"> <li>“Laboratories are not located in hospitals.” and “limited human and resources.” (Author interpreted summary, WHO CAESAR 2018 [barrier])<sup>8</sup></li> <li>“Lack of transport modalities” (Participant quote, Raupach-Rosin, H. 2017 [barrier])<sup>13</sup></li> <li>“25% of participants stated “BC bottles not readily available” as a reason not always requesting for BC</li> </ul> |                                                                                                                                                                                                                                                                                                                                                                                                                                                                                                                                                                                                                                                                                                                                                                                                                                                                                |

| TDF Domains            | Themes                                                | Systematic review for the global evidence                                                                                                                                                                                                                                                                                                                                                                                                                                                                                                                                                                                                                                                                                                                                                                                                      | TDF survey in Indonesia, Thailand and Vietnam                                                                                                                                                                                                                                                                                                                                                                                                                                                                                                                                                                                                                                                                                                                                                                                                                                                                                                                                                                                                                               |
|------------------------|-------------------------------------------------------|------------------------------------------------------------------------------------------------------------------------------------------------------------------------------------------------------------------------------------------------------------------------------------------------------------------------------------------------------------------------------------------------------------------------------------------------------------------------------------------------------------------------------------------------------------------------------------------------------------------------------------------------------------------------------------------------------------------------------------------------------------------------------------------------------------------------------------------------|-----------------------------------------------------------------------------------------------------------------------------------------------------------------------------------------------------------------------------------------------------------------------------------------------------------------------------------------------------------------------------------------------------------------------------------------------------------------------------------------------------------------------------------------------------------------------------------------------------------------------------------------------------------------------------------------------------------------------------------------------------------------------------------------------------------------------------------------------------------------------------------------------------------------------------------------------------------------------------------------------------------------------------------------------------------------------------|
|                        | Out-of-pocket                                         | <p>(Statistical data, Ojide, CK. 2013 [barrier])<sup>14</sup></p> <ul style="list-style-type: none"> <li>• “25% of participants stated “cost consideration for the patients” as a reason not always requesting for BC.” (Statistical data, Ojide, CK. 2013 [barrier])<sup>14</sup></li> </ul>                                                                                                                                                                                                                                                                                                                                                                                                                                                                                                                                                  | <ul style="list-style-type: none"> <li>• “BC is essential, but it costs a lot (Indonesia Rp 750.000,00 [about 52US\$]), and many patients could not afford it.” (TDF-IND [barrier])</li> <li>• “Patients usually refuse BC due to the cost.” (TDF-IND [barrier])</li> </ul>                                                                                                                                                                                                                                                                                                                                                                                                                                                                                                                                                                                                                                                                                                                                                                                                 |
| Behavioural regulation | Regulations on cost reimbursement                     | <ul style="list-style-type: none"> <li>• “Cost pressure is a major challenge in Italy, where 41% of ICUs and 54% of LABs agree upon this limitation ” (Statistical data, Schmitz, RP, 2013 [barrier])<sup>32</sup></li> <li>• “The use of microbiological diagnostics is subject to financial and logistical constraints outside the control of a surveillance system. For example, few BC may be taken in routine clinical care if bacteriological sampling is not reimbursed through health insurance.” (Author interpreted summary, WHO CAESAR 2018 [enabler])<sup>8</sup></li> </ul>                                                                                                                                                                                                                                                       | <ul style="list-style-type: none"> <li>• “National insurance coverage and hospital regulation could inhibit BC examination.” (TDF-IND [barrier])</li> <li>• “The insurance often disapproves of BC examination. It is only approved when patients are admitted to the ICU or HCU [High Care Unit].” (TDF-IND [barrier])</li> <li>• “It is affected by the insurance. Healthcare and Social Security Agency in Indonesia only covers septic patients around two million rupiahs/patient [about 138 US\$], it is not sufficient to cover the resources required, including BC examinations.” (TDF-IND [barrier]).</li> <li>• “Some hospitals allow only three laboratory tests; therefore, (doctors) must select laboratory tests for patients.” (TDF-TH [barrier])</li> <li>• “When the final diagnosis does not match, (the cost of BC) will not be paid by Health Insurance.” (TDF-VN [barrier])</li> <li>• “Medical professionals often object to BC due to tiredness [disheartened feeling] and the consequence of reduced reimbursement.” (TDF-VN [barrier])</li> </ul> |
|                        | Procedures to support or regulate doctors to order BC | <ul style="list-style-type: none"> <li>• "Our interventions (including identification using daily review of inpatient orders, mitigation using reminder to providers who did not have a BC ordered for eligible patients, and implementing electronic medical record system that can assist physicians in obtaining BC) can increase the percentage of children admitted with community-acquired pneumonia who have a BC performed from 53% to 100% in 6 months." (Author interpreted summary, Murtagh KE 2015 [enabler])<sup>41</sup></li> <li>• “Half the hospitals had defined clinical indications for initial BCs orders, with two-thirds having no policy for follow-up BCs.” (Statistical data, Garcia, RA. 2017 [enabler and barrier])<sup>31</sup></li> <li>• “6% (of infection specialists) declared not having access to</li> </ul> |                                                                                                                                                                                                                                                                                                                                                                                                                                                                                                                                                                                                                                                                                                                                                                                                                                                                                                                                                                                                                                                                             |

| TDF Domains               | Themes                                   | Systematic review for the global evidence                                                                                                                                                                                                                                                                                                                                                                                                                                                                                                                       | TDF survey in Indonesia, Thailand and Vietnam                                                                                                                                                                                                                                                                                                                                                                                                                                                                                                                                                                                                                                                                                                                                                                           |
|---------------------------|------------------------------------------|-----------------------------------------------------------------------------------------------------------------------------------------------------------------------------------------------------------------------------------------------------------------------------------------------------------------------------------------------------------------------------------------------------------------------------------------------------------------------------------------------------------------------------------------------------------------|-------------------------------------------------------------------------------------------------------------------------------------------------------------------------------------------------------------------------------------------------------------------------------------------------------------------------------------------------------------------------------------------------------------------------------------------------------------------------------------------------------------------------------------------------------------------------------------------------------------------------------------------------------------------------------------------------------------------------------------------------------------------------------------------------------------------------|
|                           |                                          | guidelines in their hospital.” (Statistical data, Diallo, K. [barrier]) <sup>46</sup>                                                                                                                                                                                                                                                                                                                                                                                                                                                                           |                                                                                                                                                                                                                                                                                                                                                                                                                                                                                                                                                                                                                                                                                                                                                                                                                         |
| Reinforcement             | Consequences that discourage BC sampling |                                                                                                                                                                                                                                                                                                                                                                                                                                                                                                                                                                 | <ul style="list-style-type: none"> <li>• “Warnings are given due to the costly examination, especially for patients insured with the Healthcare and Social Security Agency.” (TDF-IND [barrier])</li> <li>• “Sometimes, the cost of BC cannot be reimbursed, and the doctor has to pay.” (TDF-VN [barrier])</li> <li>• “Occasionally, the insurance assessment agency often asks questions, requires explanations and can make it difficult to limit the order of BC for patients.” (TDF-VN [barrier])</li> </ul>                                                                                                                                                                                                                                                                                                       |
|                           | Consequences that encourage BC sampling  |                                                                                                                                                                                                                                                                                                                                                                                                                                                                                                                                                                 | <ul style="list-style-type: none"> <li>• “The consequences are usually minimal. The hospital prioritizes the clinical improvement and satisfaction of the patients and their families instead of conducting according to the guidelines or minimizing antibiotic resistance.” (TDF-IND [barrier])</li> <li>• “If the patient dies without BC testing, it will be questioned in the death case report.” (TDF-IND [enabler])</li> <li>• “If (we) do not follow the recommendation for (BC) diagnostic tests, there will be a verbal reprimand in order to make sure that the care is up to the standard.” (TDF-TH [enabler])</li> <li>• “There are no incentives, rewards or penalties.” (TDF-VN [lack of enabler])</li> <li>• “The case of septic shock without a BC will be reprimanded.” (TDF-VN [enabler])</li> </ul> |
| Belief about consequences | Perception that BC is helpful            | <ul style="list-style-type: none"> <li>• “The ability of BC to rule in or rule out infection was very/extremely acceptable in 67% and 36% (of practitioners), respectively” (Statistical data, She, RC. 2017 [enabler])<sup>12</sup></li> </ul>                                                                                                                                                                                                                                                                                                                 | <ul style="list-style-type: none"> <li>• “Immediate use of BC and prior to giving antibiotics (is helpful because it) can inform whether a patient has bacteraemia or not, what organism is the cause, and which antibiotic would be appropriate.” (TDF-TH [enabler])</li> </ul>                                                                                                                                                                                                                                                                                                                                                                                                                                                                                                                                        |
|                           | Perception that BC is unnecessary        | <ul style="list-style-type: none"> <li>• “‘Delay in getting results’, ‘results often not convincing’, ‘results often negative’, ‘always growing Staphylococcus’, ‘don’t isolate anaerobes’, ‘results often not agreeing with clinical signs’ were reasons given for not always requesting for BC when required or for thinking that BC results are not satisfactory. (Statistical data, Ojide, CK. 2013 [barrier])<sup>14</sup></li> <li>• “‘Many false negatives’, ‘many false positives due to inappropriate taking of blood samples’, ‘many false</li> </ul> | <ul style="list-style-type: none"> <li>• “(BC is unnecessary because) BC often requires a long time to generate the results. Hence, the patient’s condition has improved with empirical antibiotics when BC results are generated.” (TDF-IND [barrier])</li> <li>• “(BC is unnecessary because) laboratory often causes contamination, making the result irrelevant to clinical signs.” (TDF-TH [barrier])</li> <li>• “(BC is unnecessary because) most patients have self-medication with antibiotics at home, so BC often yields</li> </ul>                                                                                                                                                                                                                                                                           |



| TDF Domains                              | Themes                                                                           | Systematic review for the global evidence                                                                                                                                                                                                                                                                                                                                                                                                                                                                                                                                                                                                                                          | TDF survey in Indonesia, Thailand and Vietnam                                                                                                                                                                                                                                                                                                                               |
|------------------------------------------|----------------------------------------------------------------------------------|------------------------------------------------------------------------------------------------------------------------------------------------------------------------------------------------------------------------------------------------------------------------------------------------------------------------------------------------------------------------------------------------------------------------------------------------------------------------------------------------------------------------------------------------------------------------------------------------------------------------------------------------------------------------------------|-----------------------------------------------------------------------------------------------------------------------------------------------------------------------------------------------------------------------------------------------------------------------------------------------------------------------------------------------------------------------------|
|                                          |                                                                                  | positives due to delayed transport to the laboratory’, ‘low reaction of clinicians’ are regarded as challenges for BC testing” (Statistical data, Schmitz, RP, 2013 [barrier]) <sup>32</sup>                                                                                                                                                                                                                                                                                                                                                                                                                                                                                       | undesirable results.” (TDF-VN [barrier])<br><ul style="list-style-type: none"> <li>“(BC is unnecessary because) time to return results is slow and most of them do not find pathogenic bacteria.” (TDF-VN [barrier])</li> <li>“BCs are not useful when the focal point of the infection is clear and the patient responds well to treatment.” (TDF-VN [barrier])</li> </ul> |
| Memory, attention and decision processes | Patients who are already on antibiotics or have anemia                           | <ul style="list-style-type: none"> <li>“66.7% of participants agreed that if patient is already on antibiotics, they still request BC if indicated, while 26.4% disagree and 6.9% unsure.” (Statistical data, Ojide, CK. 2013 [barrier])<sup>14</sup></li> </ul>                                                                                                                                                                                                                                                                                                                                                                                                                   |                                                                                                                                                                                                                                                                                                                                                                             |
|                                          | Clinical presentations for deciding to order BC                                  | <ul style="list-style-type: none"> <li>“Reasons for BC sampling included fever (81.2%), chills (45.6%), clinical suspicion of infection (41.4%), increase in temperature (26.8%), procalcitonin increase (23.2%), CRP increase (21.3%), leukocytosis (17.0%), neutropenia (10.6%), hypothermia (7.8%), neurological symptoms (5.0%), infection focus known (4.7%) and left shift in blood count (1.3%).” (Statistical data, Raupach-Rosin, H. 2017 [barrier])<sup>13</sup></li> </ul>                                                                                                                                                                                              |                                                                                                                                                                                                                                                                                                                                                                             |
| Optimism                                 | Confidence that BC will be appropriately sampled and processed in the laboratory |                                                                                                                                                                                                                                                                                                                                                                                                                                                                                                                                                                                                                                                                                    |                                                                                                                                                                                                                                                                                                                                                                             |
| Skill                                    | Skill in drawing blood for BC                                                    | <ul style="list-style-type: none"> <li>“Only 31.7% reported to wait always for 60 s after skin disinfection as suggested by German guidelines.” and “Sterile performance is difficult.” (Statistical data and author interpreted summary, Raupach-Rosin, H. 2017 [barrier])<sup>13</sup></li> <li>“47% of participants had been previously trained in proper BC sampling technique and 53% had not.” (Statistical data, Chew KS 2013 [enabler and barrier])<sup>15</sup></li> <li>“77% of hospitals provided training on proper collection of BCs, mainly using 1-on-1 education sessions (60%).” (Statistical data, Garcia RA 2017 [enabler and barrier])<sup>31</sup></li> </ul> |                                                                                                                                                                                                                                                                                                                                                                             |
| Beliefs about capabilities               | Belief in their own capability                                                   |                                                                                                                                                                                                                                                                                                                                                                                                                                                                                                                                                                                                                                                                                    |                                                                                                                                                                                                                                                                                                                                                                             |

| TDF Domains | Themes                                                     | Systematic review for the global evidence | TDF survey in Indonesia, Thailand and Vietnam                                                                                                                                                                                                                                                                                                                                                                                                                                       |
|-------------|------------------------------------------------------------|-------------------------------------------|-------------------------------------------------------------------------------------------------------------------------------------------------------------------------------------------------------------------------------------------------------------------------------------------------------------------------------------------------------------------------------------------------------------------------------------------------------------------------------------|
|             | to draw blood                                              |                                           |                                                                                                                                                                                                                                                                                                                                                                                                                                                                                     |
|             | Belief in capability of those who are tasked to draw blood |                                           |                                                                                                                                                                                                                                                                                                                                                                                                                                                                                     |
| Emotion     | Fear or anxiety of healthcare providers                    |                                           | <ul style="list-style-type: none"> <li>• “In some patients with blood-borne infectious diseases, doctors are afraid to draw blood.” (TDF-VN [barrier])</li> <li>• “Nurses are afraid to draw a lot of blood.” (TDF-VN [barrier])</li> </ul>                                                                                                                                                                                                                                         |
|             | Fear or anxiety of patients or families of patients        |                                           | <ul style="list-style-type: none"> <li>• “Patient and their families are afraid of contracting blood-transmitted diseases.” (TDF-INDs [barrier])</li> <li>• “Patient are afraid to be drawn a lot of blood.” (TDF-VN [barrier])</li> <li>• “Fear of pain. Fear of needle” (TDF-TH [barrier])</li> <li>• “Anxiety, panic or uncooperative attitude.” (TDF-VN [barrier])</li> <li>• “Patients are afraid that taking a lot of blood will cause anemia.” (TDF-VN [barrier])</li> </ul> |

502

503 TDF-IND= TDF survey: Indonesian respondent; TDF-TH= TDF survey: Thai respondent; TDF-VN= TDF survey: Vietnamese respondent.

504 Table 4. Suggested intervention types and policy options to improve BC sampling practice based  
 505 on very important TDF domains in Indonesia, Thailand and Vietnam

506

|                                       | COM-B components <sup>1</sup>                              |                                                            |                                         |                                       |                                     |
|---------------------------------------|------------------------------------------------------------|------------------------------------------------------------|-----------------------------------------|---------------------------------------|-------------------------------------|
|                                       | Psychologic<br>al capability<br>(TDF:<br>Know, Beh<br>Reg) | Reflective<br>motivation<br>(TDF:<br>Goals, Int<br>and Id) | Automatic<br>motivation<br>(TDF: Reinf) | Physical<br>opportunity<br>(TDF: Env) | Social<br>opportunity<br>(TDF: Soc) |
| <b>Intervention types<sup>2</sup></b> |                                                            |                                                            |                                         |                                       |                                     |
| Education                             | √                                                          | √                                                          |                                         |                                       |                                     |
| Persuasion                            |                                                            | √                                                          | √                                       |                                       |                                     |
| Incentivisation                       |                                                            | √                                                          | √                                       |                                       |                                     |
| Coercion                              |                                                            | √                                                          | √                                       |                                       |                                     |
| Training                              | √                                                          |                                                            |                                         |                                       |                                     |
| Restriction                           |                                                            |                                                            |                                         | √                                     | √                                   |
| Environmental restructuring           |                                                            |                                                            | √                                       | √                                     | √                                   |
| Modelling                             |                                                            |                                                            | √                                       |                                       |                                     |
| Enablement                            | √                                                          |                                                            | √                                       | √                                     | √                                   |
| <b>Policy options<sup>2</sup></b>     |                                                            |                                                            |                                         |                                       |                                     |
| Communication/marketing               |                                                            | √                                                          | √                                       |                                       |                                     |
| Guidelines                            | √                                                          | √                                                          | √                                       | √                                     | √                                   |
| Fiscal                                | √                                                          | √                                                          | √                                       | √                                     | √                                   |
| Regulation                            | √                                                          | √                                                          | √                                       | √                                     | √                                   |
| Legislation                           | √                                                          | √                                                          | √                                       | √                                     | √                                   |
| Environmental/social planning         | √                                                          |                                                            | √                                       | √                                     | √                                   |
| Service provision                     | √                                                          | √                                                          | √                                       | √                                     | √                                   |

507

508 <sup>1</sup> COM-B component stands for Capability (Physical capability or Psychological capability), Opportunity (Physical  
 509 opportunity or Social opportunity), Motivation (Automatic motivation or Reflective motivation)–Behaviour,  
 510 represents source of the behaviours and is the core of the Behaviour Change Wheel (BCW). TDF = Theory domain  
 511 framework. Know = Knowledge, Beh Reg = Behavioural regulation, Goals = Goals, Int = Intentions, Id =  
 512 Social/professional role and identity, Reinf = Reinforcement, Env = Environmental context and resources, Soc =  
 513 Social influences. <sup>2</sup>Suggested intervention types and policy options were identified using the links between TDF,  
 514 the components of the COM-B and the BCW.<sup>16-18</sup>

515 *Figures*

516 *Figure 1: Flow diagram of the study selection process for the systematic review*

517

518 *Figure 2: Global map visualizing the number of studies included in the systematic review. Note.*

519 *the map shows the number of studies conducted in or included participants from each country.*

520

521 References

- 522 1. Evans L, Rhodes A, Alhazzani W, et al. Surviving sepsis campaign: international  
523 guidelines for management of sepsis and septic shock 2021. *Intensive Care Med* 2021; **47**(11):  
524 1181-247.
- 525 2. Schuts EC, Hulscher M, Mouton JW, et al. Current evidence on hospital antimicrobial  
526 stewardship objectives: a systematic review and meta-analysis. *Lancet Infect Dis* 2016; **16**(7):  
527 847-56.
- 528 3. WHO. Diagnostic stewardship: a guide to implementation in antimicrobial resistance  
529 surveillance sites. 2016. <https://apps.who.int/iris/handle/10665/251553> (accessed 1 October  
530 2022).
- 531 4. Singer M, Deutschman CS, Seymour CW, et al. The Third International Consensus  
532 Definitions for Sepsis and Septic Shock (Sepsis-3). *JAMA* 2016; **315**(8): 801-10.
- 533 5. Warren BG, Yarrington ME, Polage CR, Anderson DJ, Moehring RW. Evaluation of  
534 hospital blood culture utilization rates to identify opportunities for diagnostic stewardship. *Infect*  
535 *Control Hosp Epidemiol* 2022: 1-6.
- 536 6. Chen AI, Bilker WB, Hamilton KW, O'Donnell JA, Nachamkin I. Blood culture  
537 utilization at an academic hospital: Addressing a gap in benchmarking. *Infect Control Hosp*  
538 *Epidemiol* 2018; **39**(11): 1353-9.
- 539 7. Cassini A, Hogberg LD, Plachouras D, et al. Attributable deaths and disability-adjusted  
540 life-years caused by infections with antibiotic-resistant bacteria in the EU and the European  
541 Economic Area in 2015: a population-level modelling analysis. *Lancet Infect Dis* 2019; **19**(1):  
542 56-66.

- 543 8. WHO. Central Asian and Eastern European Surveillance of Antimicrobial Resistance.  
544 Annual Report 2018. 2018.  
545 [https://www.euro.who.int/\\_data/assets/pdf\\_file/0007/386161/52238-WHO-CAESAR-AR-](https://www.euro.who.int/_data/assets/pdf_file/0007/386161/52238-WHO-CAESAR-AR-2018_low_V11_web.pdf)  
546 [2018\\_low\\_V11\\_web.pdf](https://www.euro.who.int/_data/assets/pdf_file/0007/386161/52238-WHO-CAESAR-AR-2018_low_V11_web.pdf) (accessed 1 October 2022).
- 547 9. Sinto R, Lie KC, Setiati S, et al. Blood culture utilization and epidemiology of  
548 antimicrobial-resistant bloodstream infections before and during the COVID-19 pandemic in the  
549 Indonesian national referral hospital. *Antimicrob Resist Infect Control* 2022; **11**(1): 73.
- 550 10. Teerawattanasook N, Tauran PM, Teparrukkul P, et al. Capacity and Utilization of Blood  
551 Culture in Two Referral Hospitals in Indonesia and Thailand. *Am J Trop Med Hyg* 2017; **97**(4):  
552 1257-61.
- 553 11. Takeshita N, Anh NQ, Phuong DM, et al. Assessment of Bacteremia in a Large Tertiary  
554 Care Hospital in Northern Vietnam: a Single-Center Retrospective Surveillance Study. *Jpn J*  
555 *Infect Dis* 2019; **72**(2): 118-20.
- 556 12. She RC, Alrabaa S, Lee SH, Norvell M, Wilson A, Petti CA. Survey of physicians'  
557 perspectives and knowledge about diagnostic tests for bloodstream infections. *PLoS One* 2015;  
558 **10**(3): e0121493.
- 559 13. Raupach-Rosin H, Duddeck A, Gehrlich M, et al. Deficits in knowledge, attitude, and  
560 practice towards blood culture sampling: results of a nationwide mixed-methods study among  
561 inpatient care physicians in Germany. *Infection* 2017; **45**(4): 433-41.
- 562 14. Ojide CK, Onwuezobe IA, Asuquo EE, Obiagwu CS. Knowledge, attitude and practice of  
563 blood culture: A cross sectional study among medical doctors in a nigerian tertiary hospital.  
564 *African Journal of Clinical and Experimental Microbiology* 2013; **14**(3): 174-9.

- 565 15. Chew KS, Mohd Hashairi F, Jusoh AF, Aziz AA, Nik Hisamuddin NA, Siti Asma H.  
566 Knowledge of good blood culture sampling practice among healthcare staffs in an emergency  
567 department - Are we getting it right? *Medical Journal of Malaysia* 2013; **68**(4): 323-5.
- 568 16. Michie S, van Stralen MM, West R. The behaviour change wheel: a new method for  
569 characterising and designing behaviour change interventions. *Implement Sci* 2011; **6**: 42.
- 570 17. Cane J, O'Connor D, Michie S. Validation of the theoretical domains framework for use  
571 in behaviour change and implementation research. *Implement Sci* 2012; **7**: 37.
- 572 18. Atkins L, Francis J, Islam R, et al. A guide to using the Theoretical Domains Framework  
573 of behaviour change to investigate implementation problems. *Implementation Science* 2017;  
574 **12**(1): 77.
- 575 19. McDonagh LK, Saunders JM, Cassell J, et al. Application of the COM-B model to  
576 barriers and facilitators to chlamydia testing in general practice for young people and primary  
577 care practitioners: a systematic review. *Implement Sci* 2018; **13**(1): 130.
- 578 20. Sargent L, McCullough A, Del Mar C, Lowe J. Using theory to explore facilitators and  
579 barriers to delayed prescribing in Australia: a qualitative study using the Theoretical Domains  
580 Framework and the Behaviour Change Wheel. *BMC Fam Pract* 2017; **18**(1): 20.
- 581 21. Lohiniva AL, Heweidy I, Girgis S, et al. Developing a theory-based behavior change  
582 intervention to improve the prescription of surgical prophylaxis. *Int J Clin Pharm* 2021.
- 583 22. Smith JD, Corace KM, MacDonald TK, et al. Application of the Theoretical Domains  
584 Framework to identify factors that influence hand hygiene compliance in long-term care. *J Hosp*  
585 *Infect* 2019; **101**(4): 393-8.
- 586 23. Hong QN, Pluye P, Farbegues S, et al. Mixed methods appraisal tool (MMAT) version  
587 2018 user guide. 2018.

- 588 [http://mixedmethodsappraisaltoolpublic.pbworks.com/w/file/attach/127916259/MMAT\\_2018\\_crit](http://mixedmethodsappraisaltoolpublic.pbworks.com/w/file/attach/127916259/MMAT_2018_crit)  
589 [eria-manual\\_2018-08-01\\_ENG.pdf](#) (accessed 1 October 2022).
- 590 24. Pluye P, Hong QN. Combining the Power of Stories and the Power of Numbers: Mixed  
591 Methods Research and Mixed Studies Reviews. *Annual Review of Public Health* 2014; **35**(1):  
592 29-45.
- 593 25. Mazza D, Chapman A, Michie S. Barriers to the implementation of preconception care  
594 guidelines as perceived by general practitioners: a qualitative study. *BMC Health Serv Res* 2013;  
595 **13**: 36.
- 596 26. Suntornsut P, Wongsuwan N, Malasit M, et al. Barriers and Recommended Interventions  
597 to Prevent Melioidosis in Northeast Thailand: A Focus Group Study Using the Behaviour  
598 Change Wheel. *PLoS Negl Trop Dis* 2016; **10**(7): e0004823.
- 599 27. Wong E, Mavondo F, Horvat L, McKinlay L, Fisher J. Healthcare professionals'  
600 perspective on delivering personalised and holistic care: using the Theoretical Domains  
601 Framework. *BMC Health Serv Res* 2022; **22**(1): 281.
- 602 28. Huijg JM, Gebhardt WA, Crone MR, Dusseldorp E, Pesseau J. Discriminant content  
603 validity of a theoretical domains framework questionnaire for use in implementation research.  
604 *Implementation Science* 2014; **9**(1): 11.
- 605 29. Patey AM, Islam R, Francis JJ, Bryson GL, Grimshaw JM, Canada PPT.  
606 Anesthesiologists' and surgeons' perceptions about routine pre-operative testing in low-risk  
607 patients: application of the Theoretical Domains Framework (TDF) to identify factors that  
608 influence physicians' decisions to order pre-operative tests. *Implement Sci* 2012; **7**: 52.



- 609 30. Parada JP, Schwartz DN, Schiff GD, Weiss KB. Effects of type and level of training on  
610 variation in physician knowledge in the use and acquisition of blood cultures: A cross sectional  
611 survey. *BMC Infectious Diseases* 2005; **5**: 71
- 612 31. Garcia RA, Spitzer ED, Kranz B, Barnes S. A national survey of interventions and  
613 practices in the prevention of blood culture contamination and associated adverse health care  
614 events. *Am J Infect Control* 2018; **46**(5): 571-6.
- 615 32. Schmitz RP, Keller PM, Baier M, Hagel S, Pletz MW, Brunkhorst FM. Quality of blood  
616 culture testing - a survey in intensive care units and microbiological laboratories across four  
617 European countries. *Crit Care* 2013; **17**(5): R248.
- 618 33. Dailey PJ, Osborn J, Ashley EA, et al. Defining System Requirements for Simplified  
619 Blood Culture to Enable Widespread Use in Resource-Limited Settings. *Diagnostics (Basel)*  
620 2019; **9**(1).
- 621 34. The T, Curfman A, Burnham CD, Hayes E, Schnadower D, with the Pediatric Emergency  
622 Medicine Collaborative Research C. Pediatric Anaerobic Blood Culture Practices in  
623 Industrialized Countries. *J Appl Lab Med* 2019; **3**(4): 553-8.
- 624 35. Kerur B, Salvador A, Arbeter A, Schutzman DL. Neonatal blood cultures: survey of  
625 neonatologists' practices. *World J Pediatr* 2012; **8**(3): 260-2.
- 626 36. Thé T, Curfman A, Burnham CD, Hayes E, Schnadower D. Pediatric Anaerobic Blood  
627 Culture Practices in Industrialized Countries. *J Appl Lab Med* 2019; **3**(4): 553-8.
- 628 37. Casu S, Häske D. Severe sepsis and septic shock in pre-hospital emergency medicine:  
629 survey results of medical directors of emergency medical services concerning antibiotics, blood  
630 cultures and algorithms. *Internal and emergency medicine* 2016; **11**(4): 571-6.

- 631 38. Pavese P, Maillet M, Vitrat-Hincky V, et al. Evaluation of an intervention to improve  
632 blood culture practices: a cluster randomised trial. *European Journal of Clinical Microbiology  
633 and Infectious Diseases* 2014; **33**(12): 2207-13.
- 634 39. Gross PA, Van Antwerpen CL, Hess WA, Reilly KA. Use and abuse of blood cultures:  
635 Program to limit use. *American Journal of Infection Control* 1988; **16**(3): 114-7.
- 636 40. Salluzzo R, Reilly K. The rational ordering of blood cultures in the emergency  
637 department. *Qual Assur Util Rev* 1991; **6**(1): 28-31.
- 638 41. Murtagh Kurowski E, Shah SS, Thomson J, et al. Improvement methodology increases  
639 guideline recommended blood cultures in children with pneumonia. *Pediatrics* 2015; **135**(4):  
640 e1052-9.
- 641 42. Sloane AJ, Pressel DM. Culture Pus, Not Blood: Decreasing Routine Laboratory Testing  
642 in Patients With Uncomplicated Skin and Soft Tissue Infections. *Hosp Pediatr* 2016; **6**(7): 394-  
643 8.
- 644 43. Tran P, Dowell E, Hamilton S, et al. Two blood cultures with age-appropriate volume  
645 enhance suspected sepsis decision-making. *Open Forum Infectious Diseases* 2020; **7**(2).
- 646 44. Kerur B, Salvador A, Arbeter A, Schutzman DL. Neonatal blood cultures: Survey of  
647 neonatologists' practices. *World Journal of Pediatrics* 2012; **8**(3): 260-2.
- 648 45. Public Health England. Achieving behaviour change. A guide for local government and  
649 partners. 2019.  
650 [https://assets.publishing.service.gov.uk/government/uploads/system/uploads/attachment\\_data/file](https://assets.publishing.service.gov.uk/government/uploads/system/uploads/attachment_data/file/875385/PHEBI_Achieving_Behaviour_Change_Local_Government.pdf)  
651 [/875385/PHEBI\\_Achieving\\_Behaviour\\_Change\\_Local\\_Government.pdf](https://assets.publishing.service.gov.uk/government/uploads/system/uploads/attachment_data/file/875385/PHEBI_Achieving_Behaviour_Change_Local_Government.pdf) (accessed 1 October  
652 2022).

653 46. Diallo K, Thilly N, Luc A, et al. Management of bloodstream infections by infection  
654 specialists: an international ESCMID cross-sectional survey. *Int J Antimicrob Agents* 2018;  
655 **51**(5): 794-8.

656

## Identification of studies via databases and registers

## Identification of studies via other methods

Identification

Records identified from:

- Clinicaltrials.gov (n = 1049)
- Cochrane Central Register of Controlled Trials (n = 288)
- Cochrane Database of Systematic Reviews (n = 299)
- CRD PROSPERO (n = 127)
- EBSCO CINAHL (n = 486)
- Ovid Embase (n = 2510)
- Ovid PsycINFO (n = 77)
- ProQuest Dissertations and Theses Global (n = 379)
- PubMed (n = 1787)
- Scopus (n = 1755)
- Web of Science All Databases (n = 2524)
- WHO Global Index Medicus (All Databases) (n = 186)

Records removed before screening:

- Duplicate records removed (n = 5486)

Records identified from:

- Organisations (n = 6)
- Citation searching (n = 188)

Screening

Records screened using titles and abstract (n = 5981)

Records excluded (n = 5291)

Records screened using titles and abstract (n = 194)

Reports sought for retrieval (n = 690)

Reports sought for retrieval (n = 194)

Eligibility

Reports assessed for eligibility (n = 690)

Reports excluded (n = 667):

- Reports were opinions, viewpoint or comments (n = 24)
- Reports were case reports (n = 2)
- Reports were reviews or meta-analysis (n = 113)
- Reports discussed the barriers or enablers to BC sampling without new primary data on barriers or enablers to BC sampling (n = 168)
- Reports neither discussed nor had new primary data on barriers or enablers to BC sampling (n = 340)
- Reports were not published in English (n = 20)

Reports assessed for eligibility (n = 194)

Reports excluded (n=192):

- Reports were opinions, viewpoint or comments (n = 6)
- Reports were reviews or meta-analysis (n = 4)
- Reports discussed the barriers or enablers to BC sampling without new primary data on barriers or enablers to BC sampling (n = 18)
- Reports neither discussed nor had new primary data on barriers or enablers to BC sampling (n = 164)

Included

Total studies included in the review (n = 25)

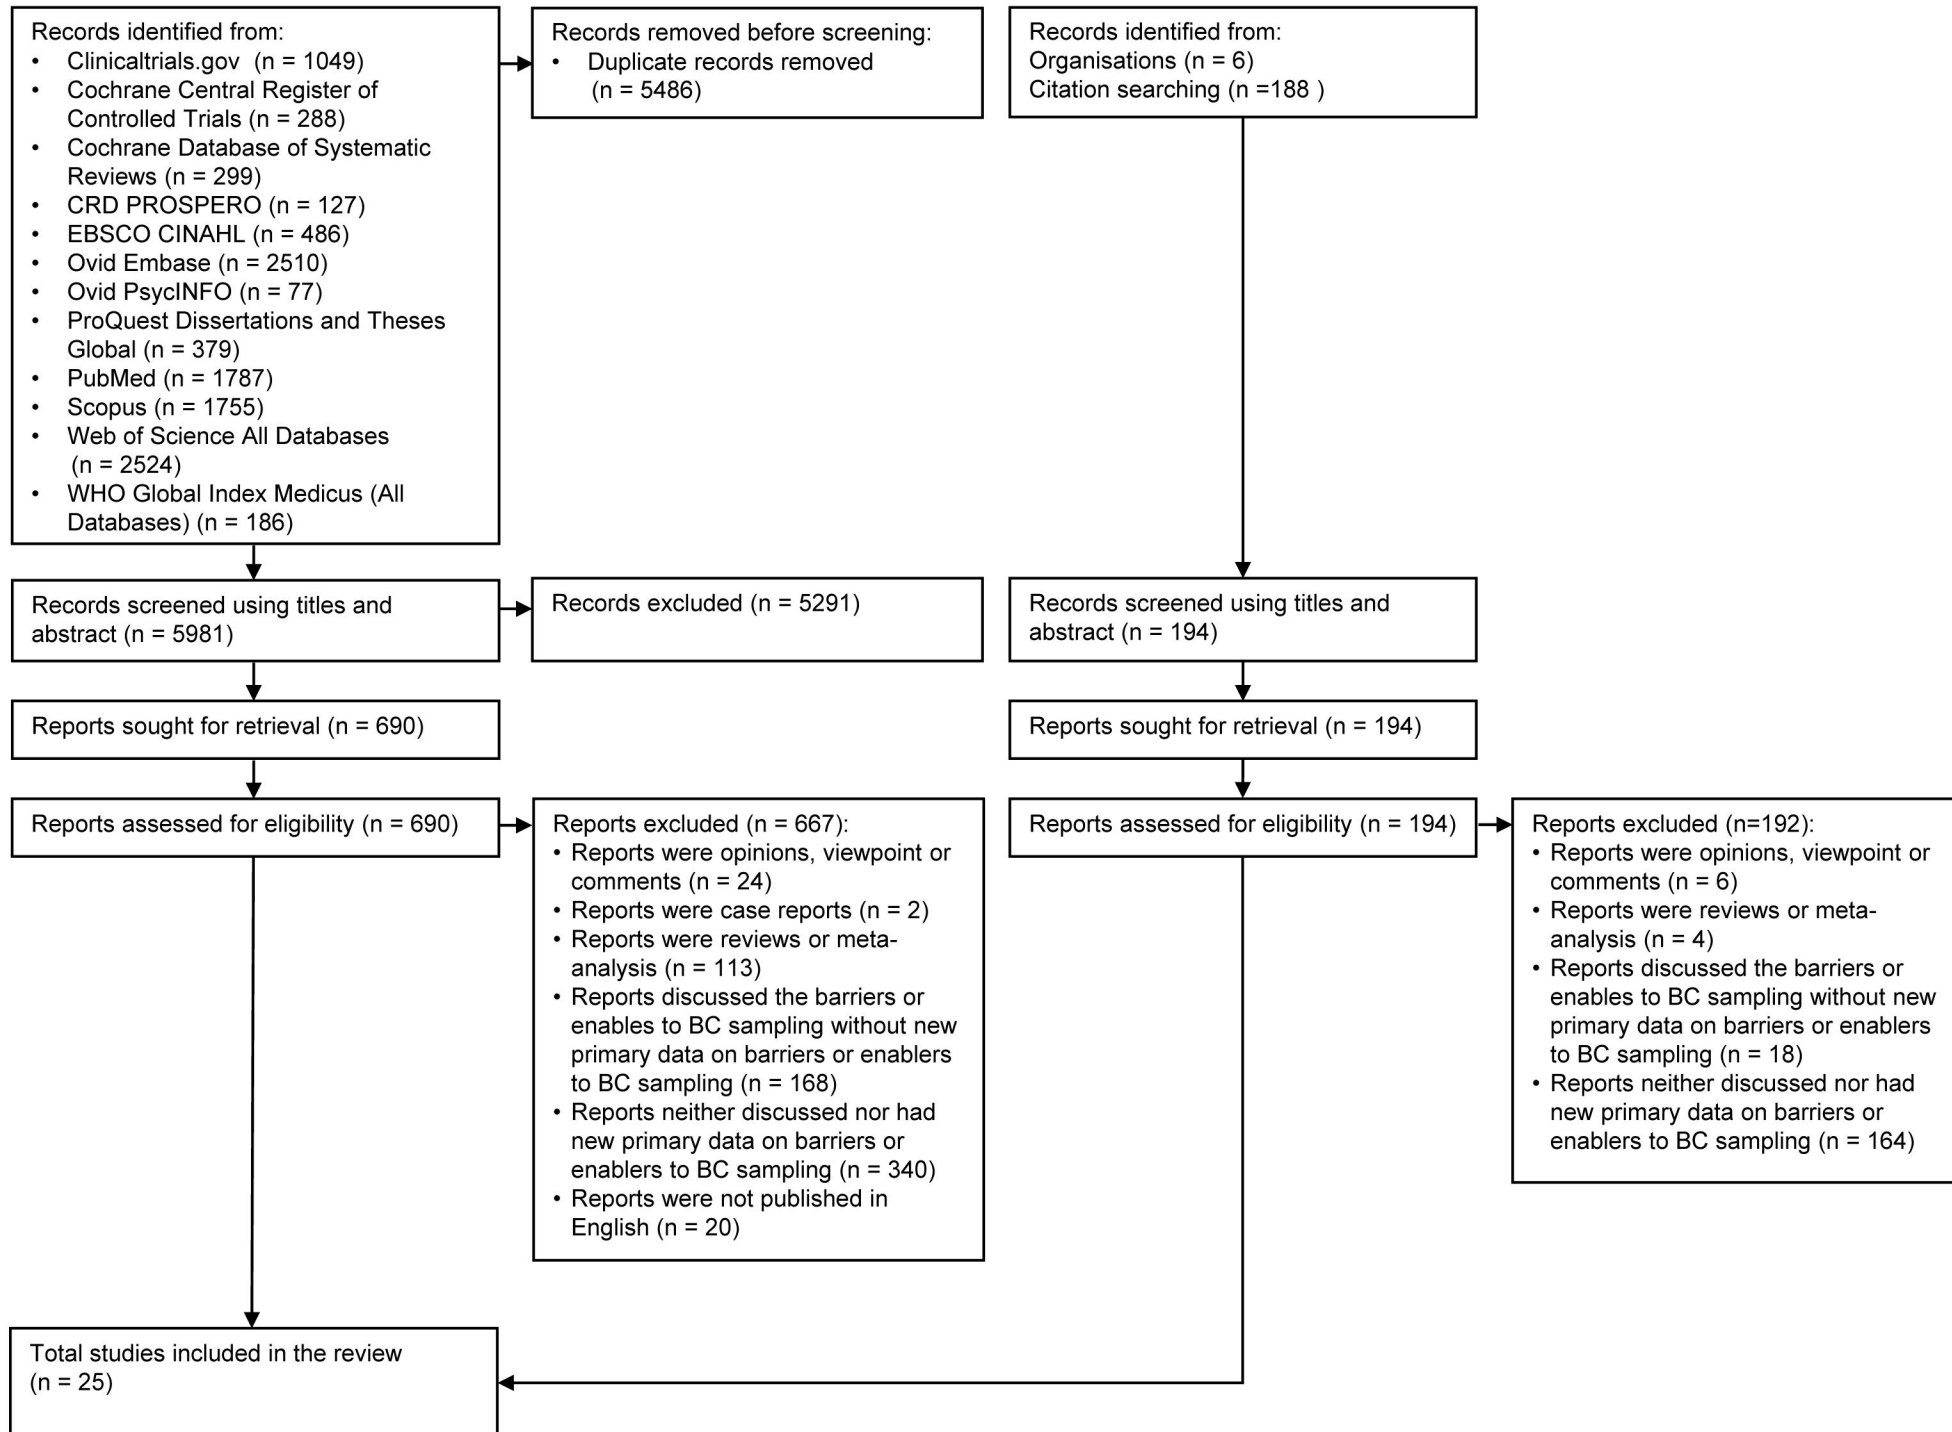

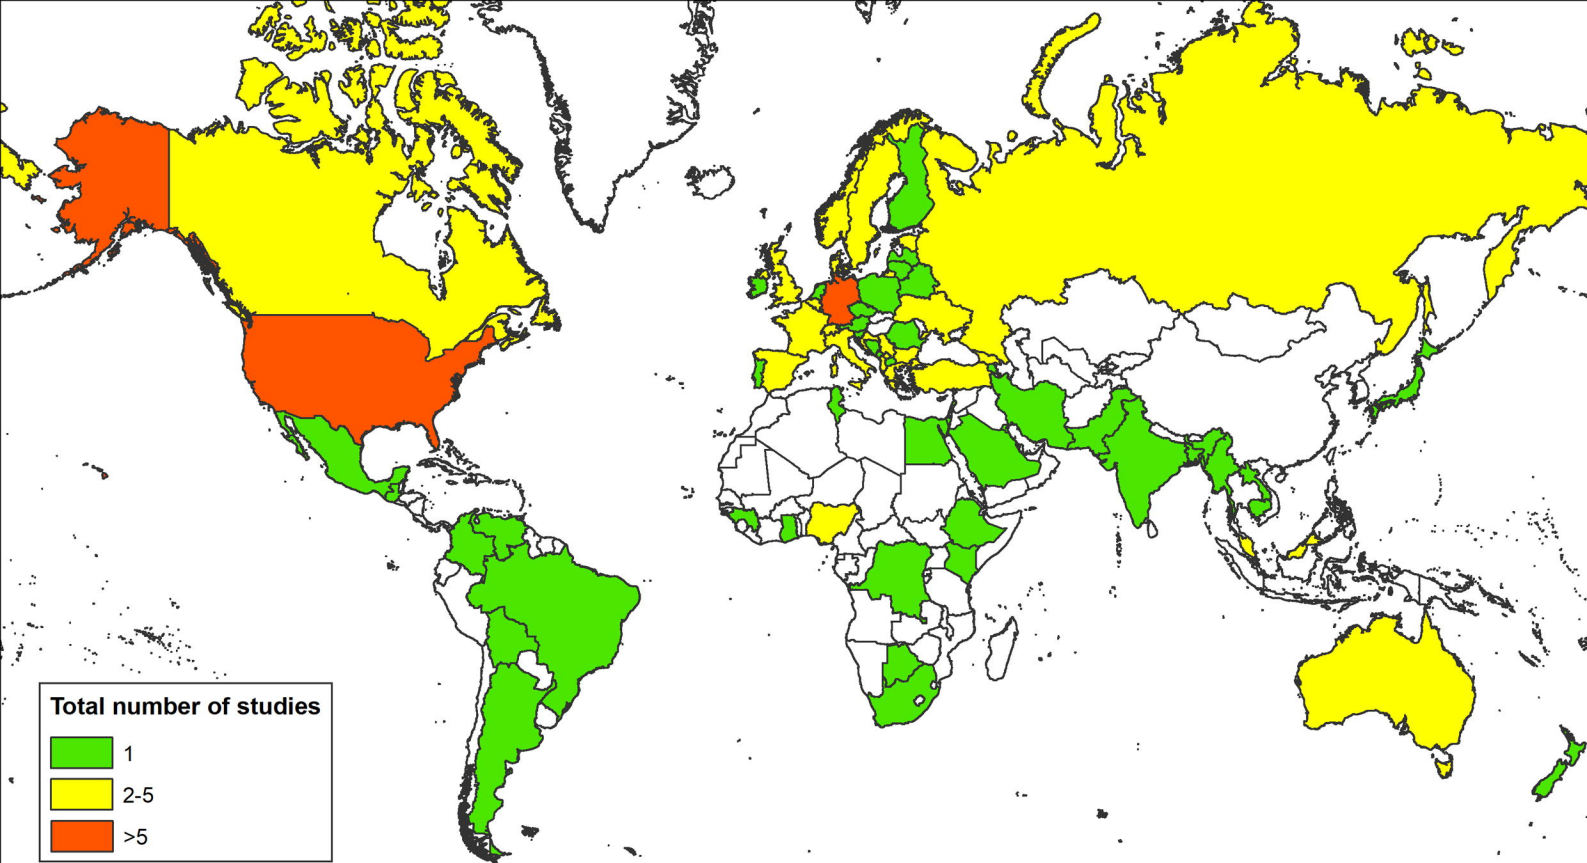

Source: https://medrxiv.org/content/10.1101/2022.11.19.22282535.full.pdf
